# Supplementary material
Source: PubMed Central journal article supplement (PMC3527242)
Supplement: 18ddc269670148a586e68b16349aa137_genetics.112.145730-8.pdf [file 18ddc269670148a586e68b16349aa137_genetics.112.145730-8.pdf]

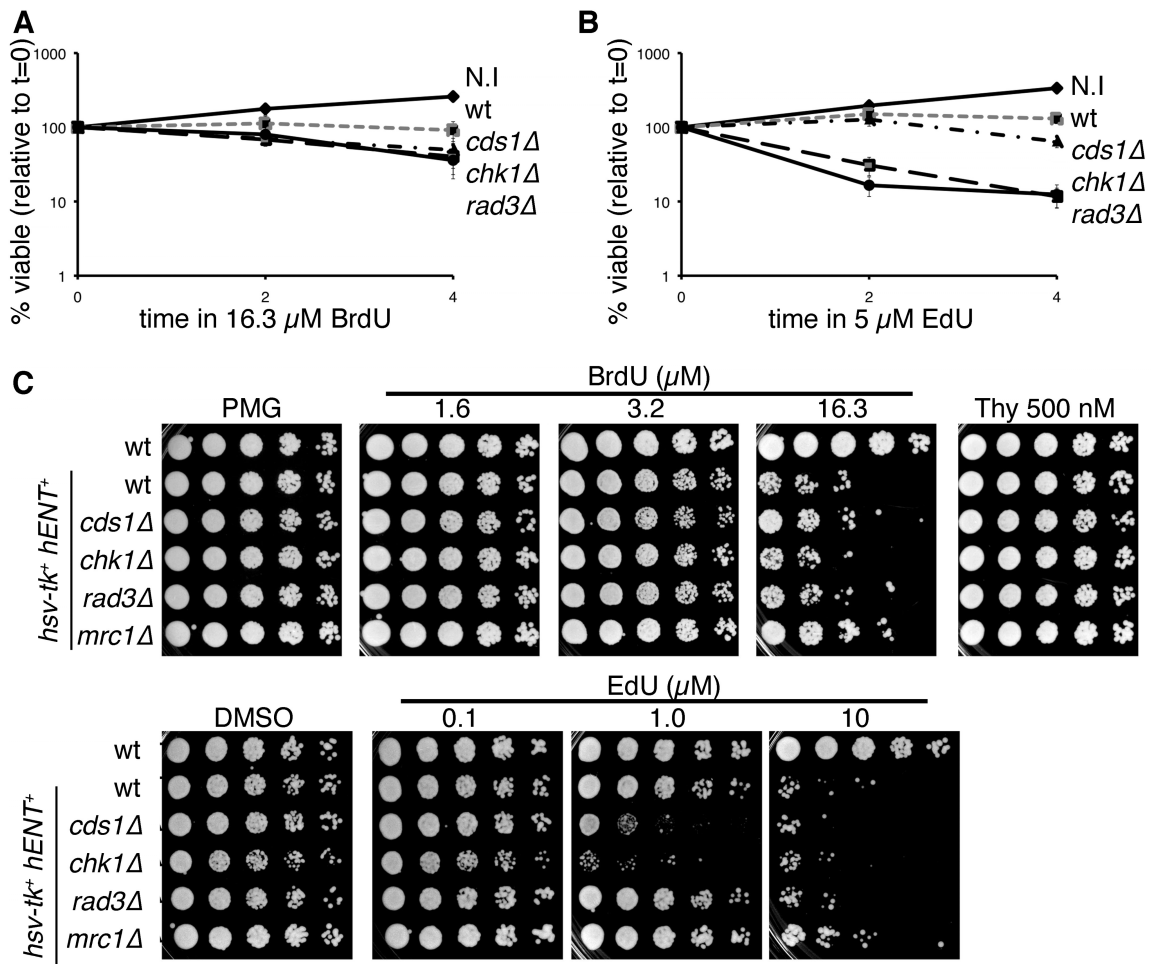

**Figure S1** BrdU and EdU dose affects cell viability (refer to Figures 1 and 2). **A.** Relative viability of *hsv-tk<sup>+</sup> hENT<sup>+</sup>* wild-type, *cds1Δ*, *chk1Δ*, and *rad3Δ* cells at 16.3 μM BrdU (compare with Figure 1B) with non-incorporating (N.I.) control. Shown are the means of two independent experiments ±SEM. **B.** As in A, viability in lower dose EdU (5 μM) (compare with Figure 1D). Shown are the means of two independent experiments ±SEM. **C.** Spot tests on poor-nitrogen source medium PMG for non-incorporating wild-type (wt) and *hsv-tk<sup>+</sup> hENT<sup>+</sup>* cells of indicated genotype (compare with Figure 2).
