# Supplementary material
Source: PubMed Central journal article supplement (PMC3527242)
Supplement: b8a4dc331394676abd2f326cb41edf82_genetics.112.145730-2.pdf [file b8a4dc331394676abd2f326cb41edf82_genetics.112.145730-2.pdf]

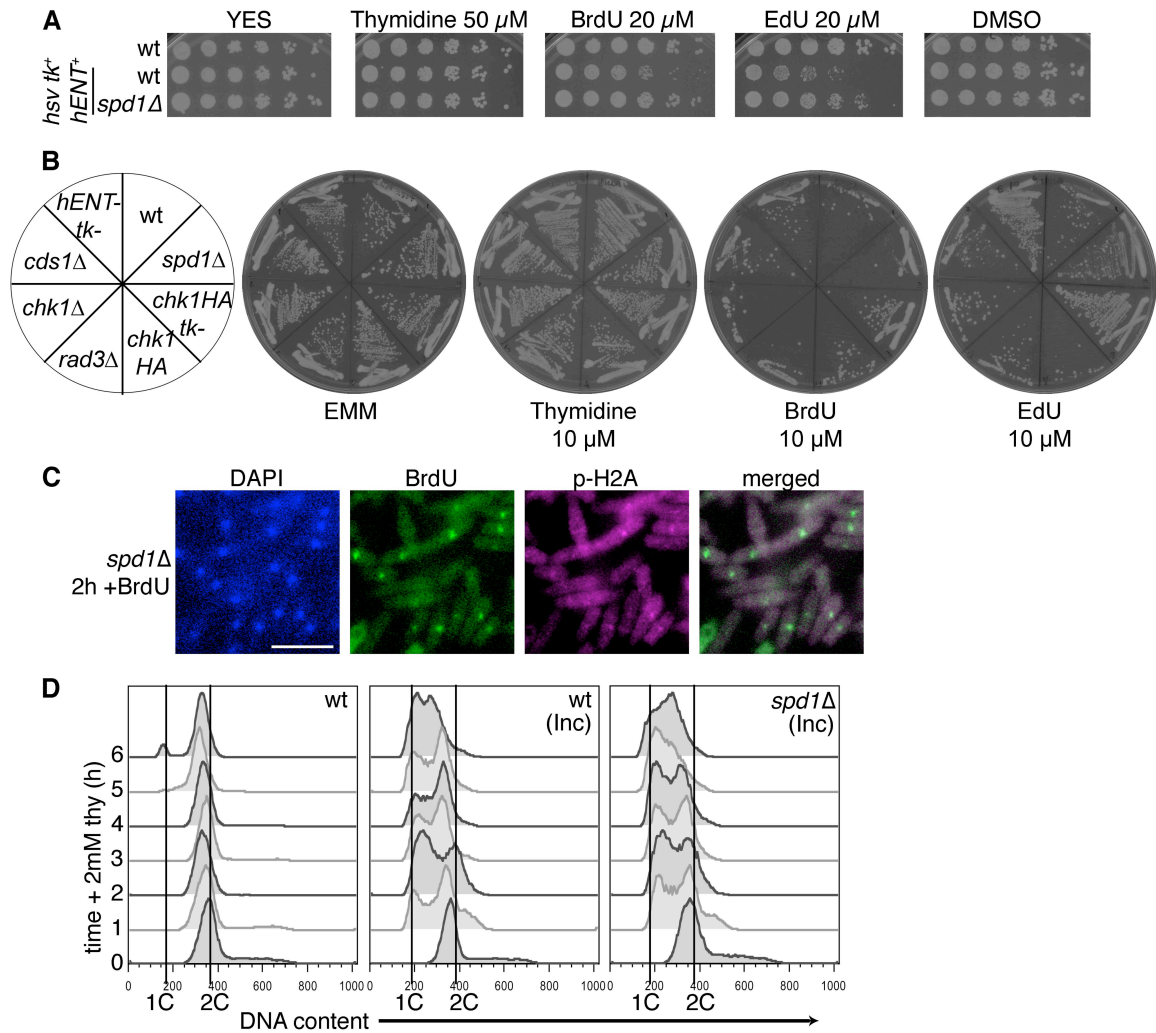

**Figure S4** Spd1 protects cells from division and mutation during dNTP imbalance (refer to Figure 7). **A.** On YES medium, *spd1 $\Delta$*  cells withstand high doses of EdU and BrdU. DMSO is a vehicle control for EdU. Note that wild-type (*wt*) *hsv-tk<sup>+</sup> hENT<sup>+</sup>* cells were also resistant to 50  $\mu$ M thymidine on rich media. **B.** Strains (FY 2317, 3454, 6427, 5030, 5031, 5150, 5149, 5148) were streaked onto supplemented EMM with thymidine, BrdU or EdU to assess growth on plates. *spd1 $\Delta$  hsv-tk<sup>+</sup> hENT<sup>+</sup>* cells formed some large colonies, but also a background of small colonies, also seen for *cds1 $\Delta$  hsv-tk<sup>+</sup> hENT<sup>+</sup>*. **C.** Immunofluorescence of *spd1 $\Delta$  hsv-tk<sup>+</sup> hENT<sup>+</sup>* cells, after 2h BrdU treatment for nuclei (DAPI), BrdU incorporation, phospho-histone H2A (p-H2A), and merged BrdU/p-H2A. Scale 10  $\mu$ m. **D.** Addition of 2 mM thymidine over prolonged periods in non-incorporating wild-type (*wt*), *wt* and *spd1 $\Delta$  hsv-tk<sup>+</sup> hENT<sup>+</sup>* cells (Inc). The 1C and 2C DNA content peaks are indicated; G1 arrest causes a shift toward the 1C peak.
